# Supplementary material for: MicroRNA-378a-3p is overexpressed in psoriasis and modulates cell cycle arrest in keratinocytes via targeting BMP2 gene
Source: PubMed Central journal article supplement (PMC8270917; doi:10.1038/s41598-021-93616-8), 2021-07-09
Supplement: 41598_2021_93616_MOESM1_ESM.pdf [file 41598_2021_93616_MOESM1_ESM.pdf]

## **Supplementary Information**

### **MicroRNA-378a-3p is overexpressed in psoriasis and modulates cell cycle arrest in keratinocytes via targeting BMP2 gene**

Wipasiri Soonthornchai<sup>1</sup>, Pattarin Tangtanatakul<sup>1,2</sup>, Patipark Kueanjinda<sup>1</sup>, Kornvatee

Meesilpavikkai<sup>3</sup>, Virgil Dalm<sup>4</sup>, Jongkonnee Wongpiyabovorn<sup>1,\*</sup>

<sup>1</sup>Center of Excellence in Immunology and Immune-Mediated Diseases, Department of Microbiology, Faculty of Medicine, Chulalongkorn University, Bangkok, Thailand 10330

<sup>2</sup>Department of Transfusion Medicine and Clinical Microbiology, Faculty of Allied Health Sciences, Chulalongkorn University, Bangkok, Thailand 10330

<sup>3</sup>Division of Mycology, Department of Microbiology, Faculty of Medicine, Chulalongkorn University, Bangkok, Thailand 10330

<sup>4</sup>Division of Clinical Immunology, Department of Internal Medicine, Erasmus University Medical Center, Rotterdam, The Netherlands

**Supplementary Figure S1. Transfection efficiency of miR-378a mimic and inhibitors in NHEK cells.** **a**, Percentage of miR-378a remaining after NHEK cells were transfected with miR-378a mimics or inhibitors for 24 hours, 48 hours and 72 hours. **b**, The proliferation analysis of NHEK cells transiently expressing miR-378a inhibitor for 24, 48, 72, and 96 hours as measured by MTS assay. Error bars indicate mean  $\pm$  SEM, \*\*\*\* indicates  $P < 0.0001$ , \*\*\* indicates  $P < 0.001$ , and ns indicates non-significant.

**Supplementary Figure S2. Expression levels of candidate genes.** Genes identified in Figure 5 (*KIAA1522*, *KRT80*, *PEF1*, *TMEM245*, *TOB2*) were measured by qPCR using mRNA from NHEK cells transfected with miR-378a mimic or inhibitor for 24 hours and 48 hours. Error bars indicate mean  $\pm$  SEM from 3 replicates. The experiment was performed three times independently. \* indicates  $P < 0.05$ , \*\* indicates  $P < 0.01$ , and \*\*\* indicates  $P < 0.001$ .

**Supplementary Figure S3. Validation of miR-378a binding to *INHBA*.** Luciferase activity of wild type (pINHBA) and mutant 3'UTR of *INHBA* genes (mutINHBA) co-transfected with miR-378a mimic or inhibitor and their negative control in HEK293T cells for 48 hours. Error bars indicate mean  $\pm$  SEM, \*\*\*\* indicates  $P < 0.0001$ , and \*\*\* indicates  $P < 0.001$ .

**Supplementary Figure S4. The effect of miR-378a on keratinocyte differentiation marker involucrin.** Western blotting was used to detect protein expression levels of involucrin in NHEK cells over-expressing miR-378a mimic or inhibitor and their negative control for 72 hours. One representative blot from four independent experiments (see Supplementary Fig. S5) was shown (top). Relative expression levels from densitometric analysis of the four blots was depicted as bar chart (bottom). Error bars indicate mean  $\pm$  SEM, \*\*\*\* indicates  $P < 0.0001$ , and \*\*\* indicates  $P < 0.001$ .

**Supplementary Figure S5. Raw images of Western blots.** Western blots were used to detect BMP2, involucrin, and GAPDH proteins in NHEK cells overexpressing miR-378a mimic or inhibitor and their negative control for 72 hours (3 days). Four independent experiments were performed (a-d).

### **Table legends**

**Supplementary Table S1. Results of KEGG pathway analysis.** KEGG pathway analysis by Enrichr using (a) DEGs from NHEK cells transfected with miR-378a mimic or its control for 24 and 48 hours and (b) DEGs from NHEK cells transfected with miR-378a inhibitor or its control for 24 and 48 hours.

**Supplementary Table S2. List of primers used for real-time PCR in this study.**

**Supplementary Table S3. List of miR-378a, *BMP2* 3' UTR, *BMP2* 3' UTR mutant, *INHBA* 3' UTR and *INHBA* 3' UTR mutant used in the luciferase study.**

a

### Transfection efficiency

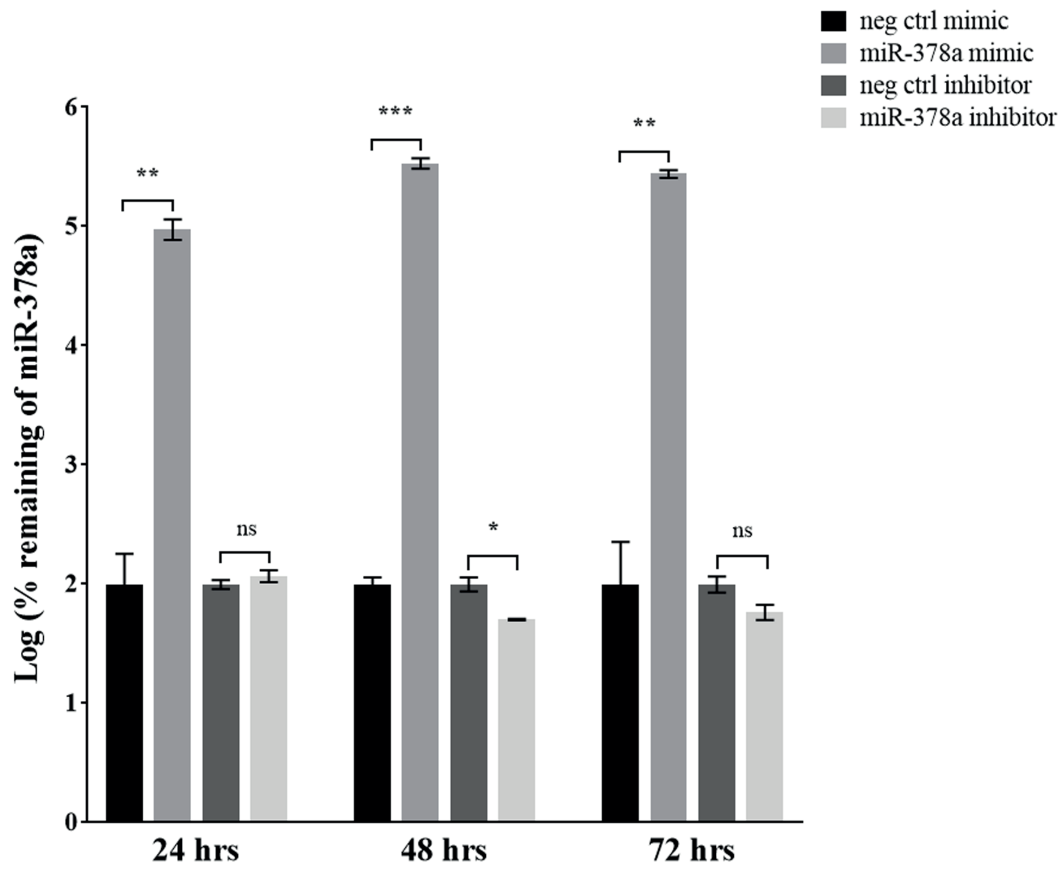

b

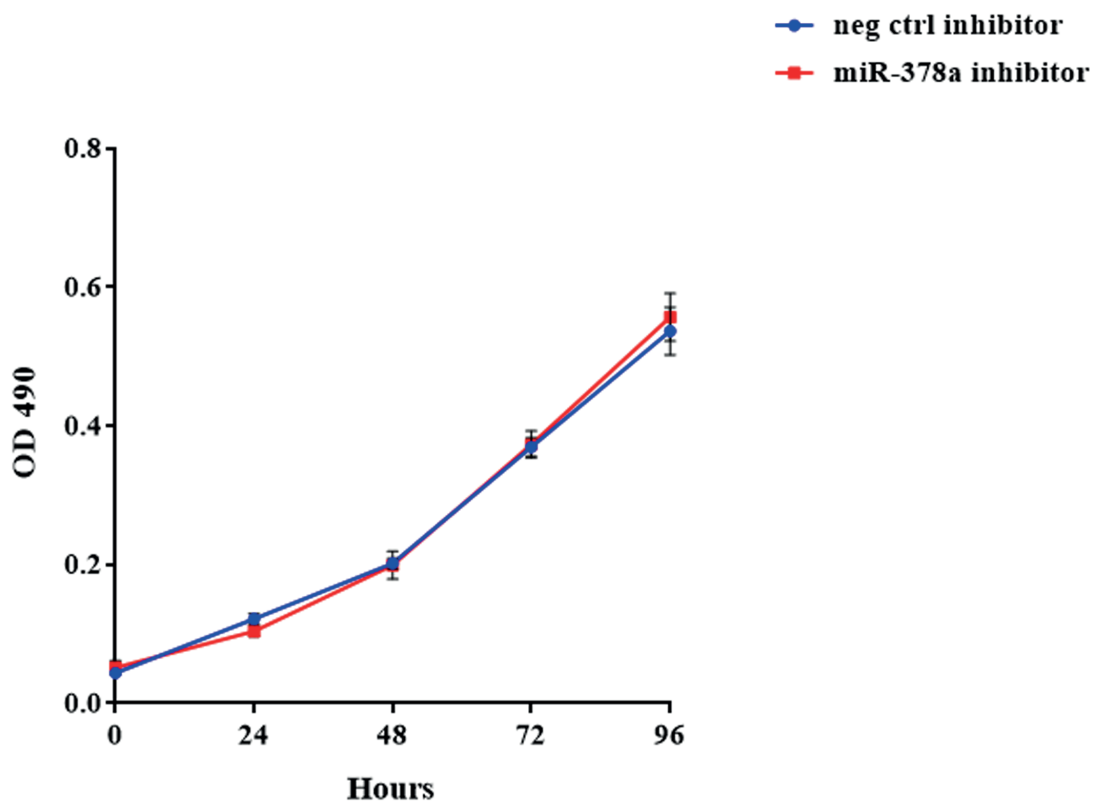

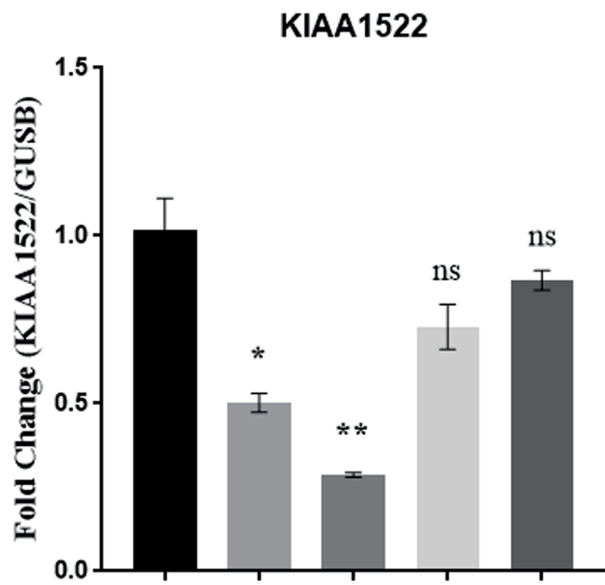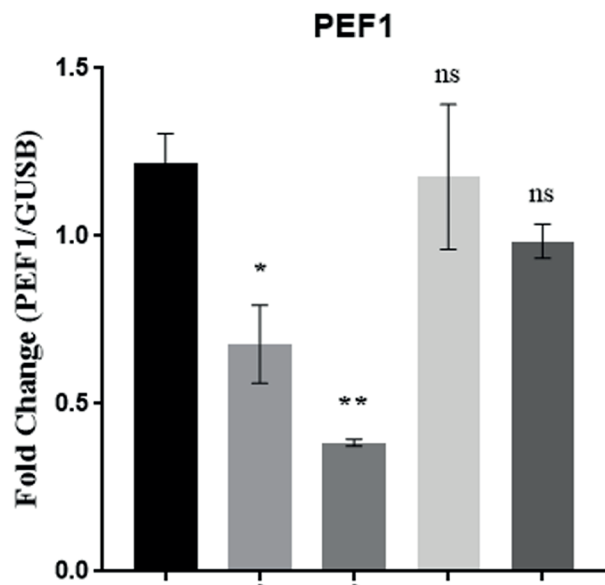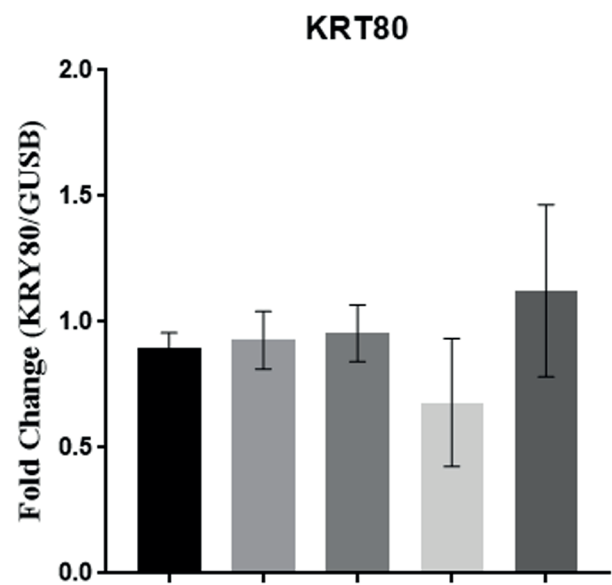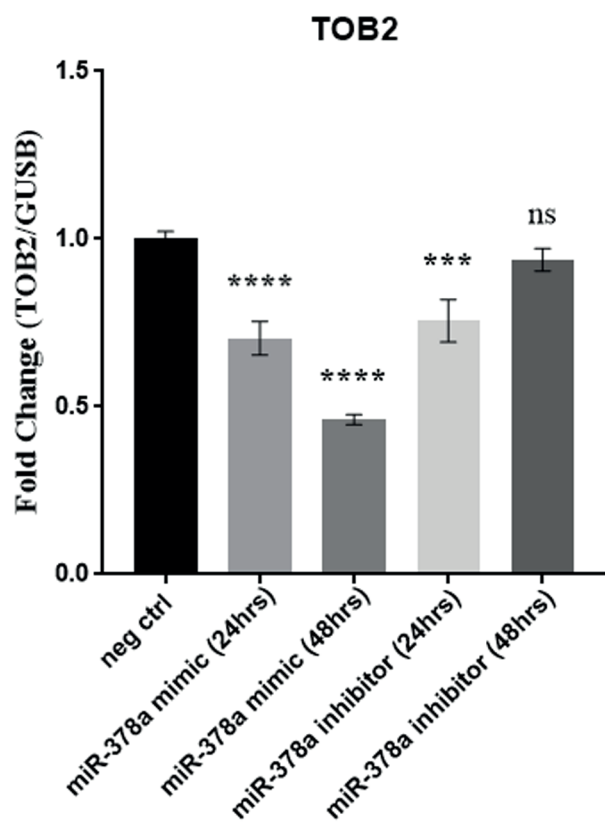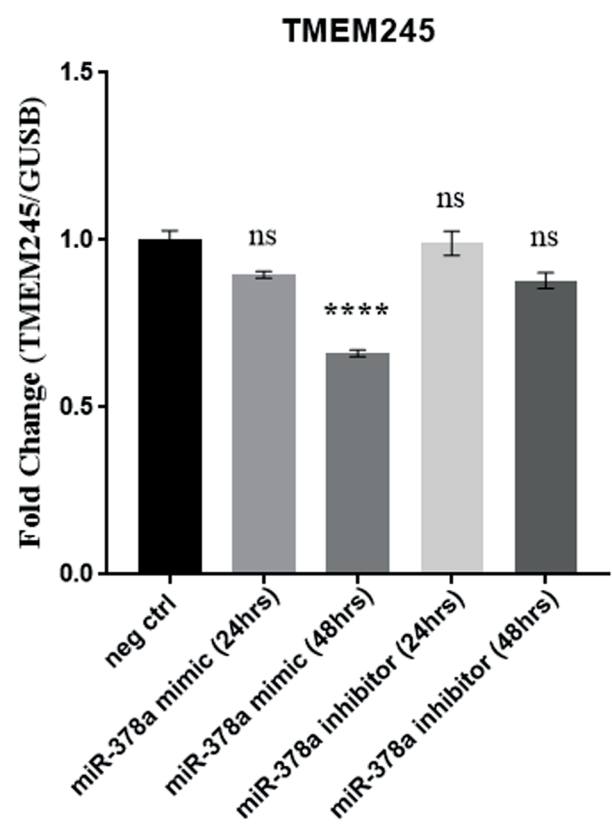

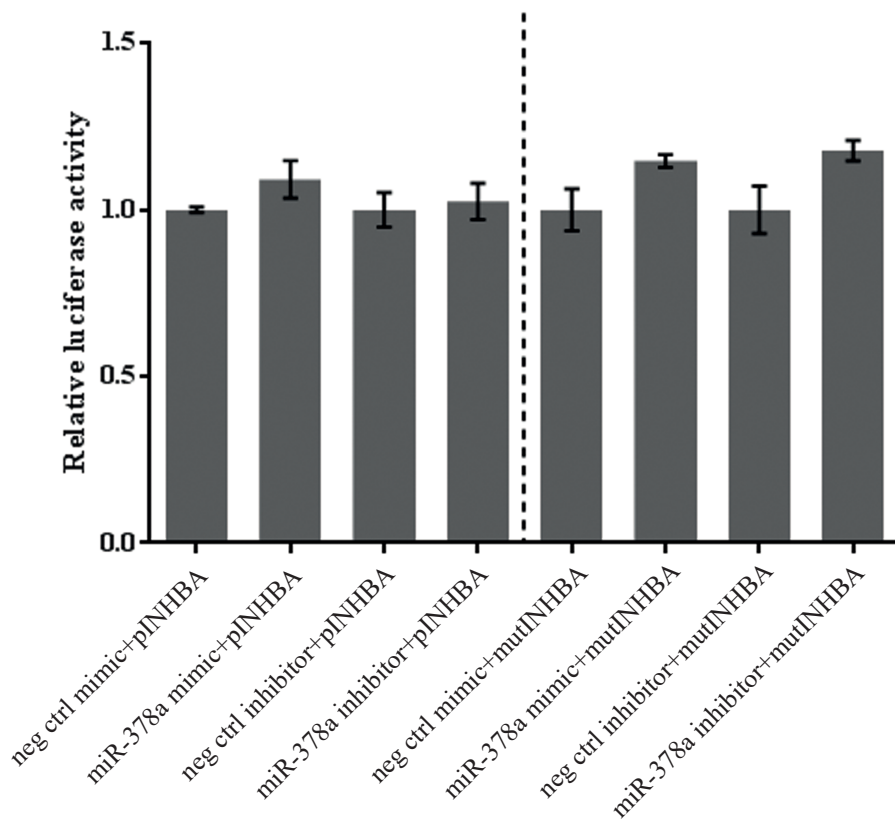

Supplementary Figure S3

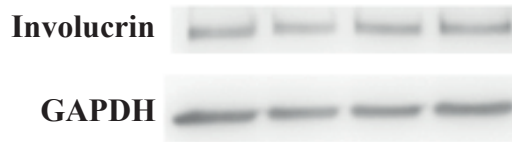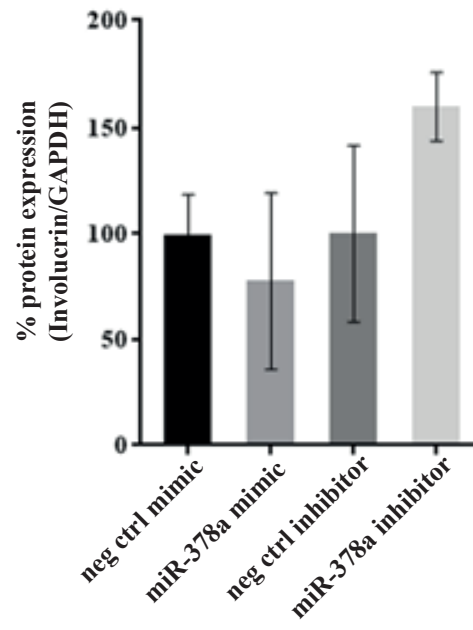

Supplementary Figure S4

**a**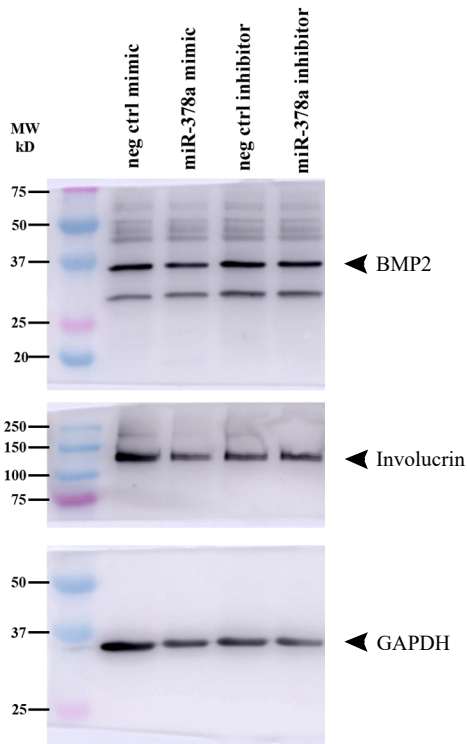**b**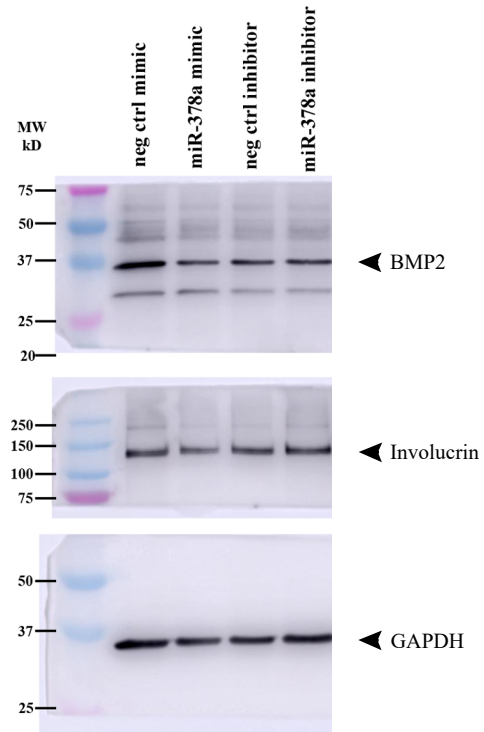**c**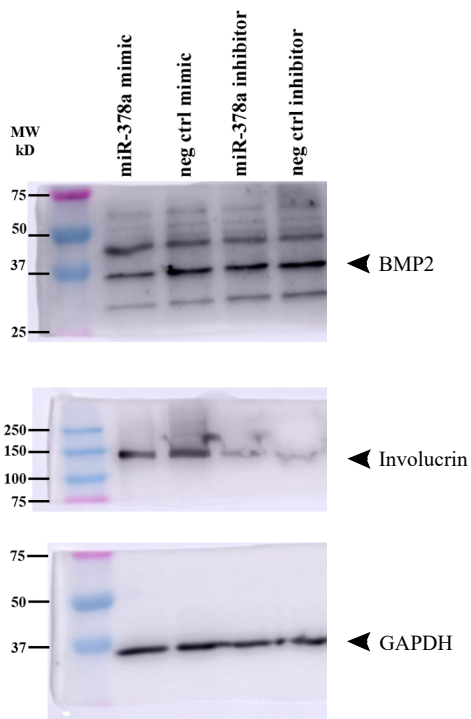**d**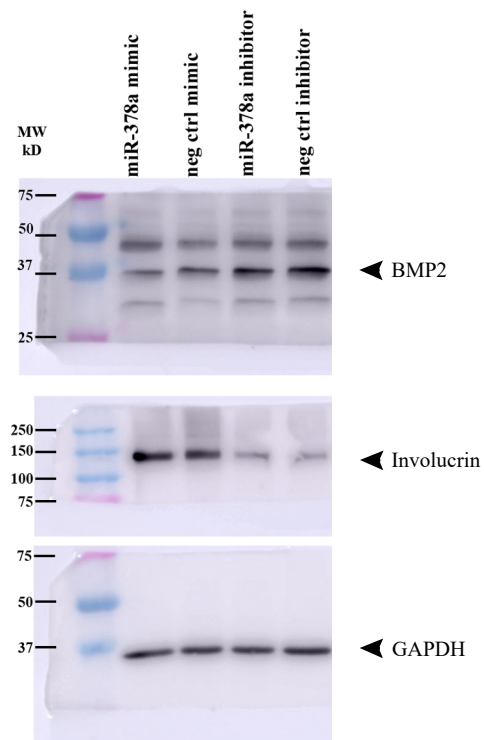



### Supplementary Table S1

a) Results of KEGG pathway analysis by Enrichr using DEGs from NHEK cells transfected with miR-378a mimic or its control for 24 and 48 hours.

| ID       | Description                             | P-value  | Gene                                                        | Expression | Time |
|----------|-----------------------------------------|----------|-------------------------------------------------------------|------------|------|
| hsa05166 | Human T-cell leukemia virus 1 infection | 2.63E-02 | TNF/CDC23/ETS1/SLC25A6                                      | down       | 24h  |
| hsa05217 | Basal cell carcinoma                    | 4.18E-03 | LEF1/PTCH1/BMP2                                             | down       | 24h  |
| hsa04350 | TGF-beta signaling pathway              | 1.26E-02 | TNF/BMP2/INHBA                                              | down       | 24h  |
| hsa04371 | Apelin signaling pathway                | 3.39E-02 | BORCS8-MEF2B/GNA13/APLN                                     | down       | 24h  |
| hsa01523 | Antifolate resistance                   | 1.12E-02 | TNF/SLC46A1                                                 | down       | 24h  |
| hsa05134 | Legionellosis                           | 3.52E-02 | TNF/C3                                                      | down       | 24h  |
| hsa05221 | Acute myeloid leukemia                  | 4.72E-02 | LEF1/PIM2                                                   | down       | 24h  |
| hsa05211 | Renal cell carcinoma                    | 4.98E-02 | RAP1B/ETS1                                                  | down       | 24h  |
| hsa05165 | Human papillomavirus infection          | 1.45E-02 | JAG1/PPP2R1B/NRAS/ITGA11/RBPJ/THBS2/VEGFA/COL6A3/TADA3/WNT3 | up         | 24h  |
| hsa04014 | Ras signaling pathway                   | 3.87E-02 | MET/NRAS/VEGFA/PLA2G4F/PLA2G4B/RASA3/KSR1                   | up         | 24h  |
| hsa00564 | Glycerophospholipid metabolism          | 2.12E-03 | GPAT3/PLPP3/PLA2G4F/GPCPD1/PLA2G4B/CDS1                     | up         | 24h  |
| hsa04370 | VEGF signaling pathway                  | 1.19E-03 | NRAS/VEGFA/PLA2G4F/SH2D2A/PLA2G4B                           | up         | 24h  |
| hsa04912 | GnRH signaling pathway                  | 8.61E-03 | NRAS/MAP2K4/PLA2G4F/HBEGF/PLA2G4B                           | up         | 24h  |
| hsa05231 | Choline metabolism in cancer            | 1.07E-02 | NRAS/PLPP3/PLA2G4F/GPCPD1/PLA2G4B                           | up         | 24h  |
| hsa05418 | Fluid shear stress and atherosclerosis  | 4.09E-02 | MAP2K4/PLAT/VEGFA/THBD/ACVR2B                               | up         | 24h  |
| hsa05219 | Bladder cancer                          | 2.24E-03 | NRAS/TYMP/VEGFA/HBEGF                                       | up         | 24h  |
| hsa04913 | Ovarian steroidogenesis                 | 4.98E-03 | CYP11B1/PLA2G4F/PLA2G4B/BMP6                                | up         | 24h  |
| hsa04730 | Long-term depression                    | 8.85E-03 | PPP2R1B/NRAS/PLA2G4F/PLA2G4B                                | up         | 24h  |
| hsa00590 | Arachidonic acid metabolism             | 1.05E-02 | ALOX15B/PLA2G4F/PLA2G4B/GPX2                                | up         | 24h  |

|          |                                                               |          |                                                                                                                                                                     |      |     |
|----------|---------------------------------------------------------------|----------|---------------------------------------------------------------------------------------------------------------------------------------------------------------------|------|-----|
| hsa04664 | Fc epsilon RI signaling pathway                               | 1.36E-02 | NRAS/MAP2K4/PLA2G4F/PLA2G4B                                                                                                                                         | up   | 24h |
| hsa04917 | Prolactin signaling pathway                                   | 1.50E-02 | NRAS/SOCS7/ESR1/SOCS5                                                                                                                                               | up   | 24h |
| hsa05120 | Epithelial cell signaling in Helicobacter pylori infection    | 1.50E-02 | PTPRZ1/MET/MAP2K4/HBEGF                                                                                                                                             | up   | 24h |
| hsa04012 | ErbB signaling pathway                                        | 2.84E-02 | EREG/NRAS/MAP2K4/HBEGF                                                                                                                                              | up   | 24h |
| hsa04350 | TGF-beta signaling pathway                                    | 3.90E-02 | PPP2R1B/FBN1/BMP6/ACVR2B                                                                                                                                            | up   | 24h |
| hsa04666 | Fc gamma R-mediated phagocytosis                              | 4.30E-02 | PLPP3/ARPC5/PLA2G4F/PLA2G4B                                                                                                                                         | up   | 24h |
| hsa01522 | Endocrine resistance                                          | 4.44E-02 | JAG1/NRAS/HBEGF/ESR1                                                                                                                                                | up   | 24h |
| hsa04061 | Viral protein interaction with cytokine and cytokine receptor | 4.72E-02 | CXCL14/ACKR3/IL24/TNFSF10                                                                                                                                           | up   | 24h |
| hsa00565 | Ether lipid metabolism                                        | 2.88E-02 | PLPP3/PLA2G4F/PLA2G4B                                                                                                                                               | up   | 24h |
| hsa05144 | Malaria                                                       | 3.03E-02 | MET/THBS2/LRP1                                                                                                                                                      | up   | 24h |
| hsa00592 | alpha-Linolenic acid metabolism                               | 4.50E-02 | PLA2G4F/PLA2G4B                                                                                                                                                     | up   | 24h |
| hsa04110 | Cell cycle                                                    | 2.19E-18 | CDC7/TTK/ATR/CCND2/MYC/E2F3/ABL1/E2F1/CDC25A/MCM3/RBL1/CDC45/ORC6/CCNE2/CDK1/ORC3/MCM2/TP53/BUB1B/BUB1/CDC20/CCNA2/MCM7/PKMYT1/CDC6/ESPL1/DBF4/ORC1/SKP2/PCNA/CDC23 | down | 48h |
| hsa05166 | Human T-cell leukemia virus 1 infection                       | 2.94E-04 | ATR/CCND2/CRTC3/MYC/E2F3/CALR/E2F1/VAC14/CCNE2/TP53/BUB1B/CDC20/CREB5/CCNA2/TNF/ESPL1/ATF6B/CDC23/SLC25A6                                                           | down | 48h |
| hsa03030 | DNA replication                                               | 2.62E-17 | RNASEH2A/RFC5/LIG1/RNASEH2C/POLE/MCM3/POLD1/POLD3/POLE2/FEN1/MCM2/PRIM2/RFC3/MCM7/POLA2/PRIM1/DNA2/PCNA                                                             | down | 48h |
| hsa03460 | Fanconi anemia pathway                                        | 1.56E-13 | ATR/UBE2T/ATRIP/RAD51C/BLM/RAD51/FANCA/FANCG/BRIP1/RMI2/FANCB/RMI1/FANCM/FANCI/EME1/POLH/BRCA1/BRCA2                                                                | down | 48h |

|          |                                   |          |                                                                                                      |      |     |
|----------|-----------------------------------|----------|------------------------------------------------------------------------------------------------------|------|-----|
| hsa04218 | Cellular senescence               | 1.01E-05 | ATR/CCND2/MYC/E2F3/E2F1/LIN9/CDC25A/RBL1/CCNE2/CDK1/FOXM1/TP53/RAD9A/CALML4/CNA2/MYBL2/LIN52/SLC25A6 | down | 48h |
| hsa05169 | Epstein-Barr virus infection      | 2.28E-03 | SAP30/CCND2/MYC/E2F3/BCL2L11/CALR/E2F1/IRAK1/IRAK4/CCNE2/LYN/TP53/CCNA2/TNF/SKP2/OAS3                | down | 48h |
| hsa03440 | Homologous recombination          | 3.68E-12 | BARD1/RAD51C/POLD1/POLD3/BLM/TOPBP1/RAD51/BRIP1/RAD54L/RAD54B/EME1/XRCC2/BRCA1/BRCA2/XRCC3           | down | 48h |
| hsa05203 | Viral carcinogenesis              | 6.18E-03 | CCND2/GRB2/VAC14/RBL1/C3/CCNE2/CDK1/LYN/TP53/CDC20/CREB5/CCNA2/HDAC3/SKP2/ATF6B                      | down | 48h |
| hsa05161 | Hepatitis B                       | 5.13E-03 | MYC/E2F3/E2F1/GRB2/IRAK1/IRAK4/CCNE2/TP53/CREB5/CCNA2/TNF/ATF6B/PCNA                                 | down | 48h |
| hsa04350 | TGF-beta signaling pathway        | 6.16E-03 | MYC/RBL1/ACVR1B/FST/TGIF2/BMP2/TNF/THSD4/INHBA                                                       | down | 48h |
| hsa04114 | Oocyte meiosis                    | 4.07E-02 | SGO1/CCNE2/CDK1/BUB1/CDC20/CALML4/PKMYT1/ESPL1/CDC23                                                 | down | 48h |
| hsa03410 | Base excision repair              | 1.51E-05 | LIG1/POLE/POLD1/POLD3/POLE2/FEN1/NEIL3/PCNA                                                          | down | 48h |
| hsa03420 | Nucleotide excision repair        | 2.22E-04 | RFC5/LIG1/POLE/POLD1/POLD3/POLE2/RFC3/PCNA                                                           | down | 48h |
| hsa05222 | Small cell lung cancer            | 1.66E-02 | MYC/LAMA1/E2F3/E2F1/TRAF4/CCNE2/TP53/SKP2                                                            | down | 48h |
| hsa05215 | Prostate cancer                   | 2.21E-02 | E2F3/E2F1/GRB2/FGFR1/FGFR2/CCNE2/TP53/CREB5                                                          | down | 48h |
| hsa03008 | Ribosome biogenesis in eukaryotes | 4.44E-02 | RIOK1/UTP14A/WDR75/NOP56/LSG1/TCOF1/REXO5/RPP25L                                                     | down | 48h |
| hsa03430 | Mismatch repair                   | 1.02E-05 | RFC5/LIG1/POLD1/POLD3/RFC3/PCNA/EXO1                                                                 | down | 48h |
| hsa04115 | p53 signaling pathway             | 1.49E-02 | ATR/CCND2/CCNE2/CDK1/TP53/GTSE1/RRM2                                                                 | down | 48h |

|          |                                             |          |                                                                                                                                                                                                                       |      |     |
|----------|---------------------------------------------|----------|-----------------------------------------------------------------------------------------------------------------------------------------------------------------------------------------------------------------------|------|-----|
| hsa03018 | RNA degradation                             | 2.22E-02 | BTG3/EXOSC4/EXOSC9/HSPD1/DIS3L/DCP1A/T<br>OB2                                                                                                                                                                         | down | 48h |
| hsa00250 | Alanine, aspartate and glutamate metabolism | 9.53E-03 | CAD/ASNS/ASS1/PPAT/GPT2                                                                                                                                                                                               | down | 48h |
| hsa05219 | Bladder cancer                              | 1.46E-02 | MYC/E2F3/E2F1/TP53/MMP2                                                                                                                                                                                               | down | 48h |
| hsa01523 | Antifolate resistance                       | 2.33E-02 | SLC46A1/TYMS/TNF/DHFR                                                                                                                                                                                                 | down | 48h |
| hsa03020 | RNA polymerase                              | 2.33E-02 | POLR3K/POLR1E/POLR2G/POLR2C                                                                                                                                                                                           | down | 48h |
| hsa00450 | Selenocompound metabolism                   | 2.11E-02 | SCLY/TXNRD1/CTH                                                                                                                                                                                                       | down | 48h |
| hsa04010 | MAPK signaling pathway                      | 8.34E-04 | PLA2G4E/EREG/PLA2G4F/PLA2G4B/FGFR4/DUS<br>P8/TGFA/NRAS/IL1R1/MAP2K4/RAC2/MAPK11/<br>MAPK13/MET/NLK/EFNA3/DUSP16/MAP3K5/ER<br>BB3/TGFB1/LAMTOR3/MAPK3/CACNB3/PDGFB/<br>NFATC1/PRKACB/RASA1/CRK/VEGFA/DUSP6/P<br>LA2G4A | up   | 48h |
| hsa05165 | Human papillomavirus infection              | 9.53E-03 | HLA-<br>G/WNT10A/JAG1/NOTCH3/NRAS/TADA3/HES4/L<br>AMC2/THBS3/THBS2/FZD7/ITGB8/PPP2R1B/WN<br>T7B/PTGS2/ITGB6/LAMB2/PPP2R5B/ATP6V0A1/<br>COL1A1/WNT3/DLG3/COL6A1/MAPK3/FOXO1/P<br>RKACB/ITGB4/GSK3B/VEGFA/LAMA3         | up   | 48h |
| hsa04151 | PI3K-Akt signaling pathway                  | 3.64E-02 | EREG/FGFR4/TGFA/GNG2/NRAS/LAMC2/THBS3/<br>THBS2/MET/ITGB8/PPP2R1B/ITGB6/EFNA3/TLR<br>2/LAMB2/PPP2R5B/ERBB3/COL1A1/COL6A1/MA<br>PK3/PDGFB/MCL1/LPAR6/ITGB4/GSK3B/IL6R/V<br>EGFA/RPTOR/LAMA3                            | up   | 48h |
| hsa05206 | MicroRNAs in cancer                         | 3.60E-02 | MMP9/CYP1B1/HMGA2/NOTCH3/NRAS/SERPIN<br>B5/MET/PRKCE/PTGS2/DNMT3B/EFNA3/SOCS1/<br>PLAU/FSCN1/ERBB3/WNT3/MAPK3/HDAC4/PDG<br>FB/MCL1/DNMT3A/TIMP3/PIM1/CRK/VEGFA/RP<br>TOR                                              | up   | 48h |

|          |                                        |          |                                                                                                                                                         |    |     |
|----------|----------------------------------------|----------|---------------------------------------------------------------------------------------------------------------------------------------------------------|----|-----|
| hsa04014 | Ras signaling pathway                  | 1.93E-03 | CALML5/PLA2G4E/PLA2G4F/PLA2G4B/FGFR4/GAB2/TGFA/PLA2G3/GNG2/NRAS/RAC2/FOXO4/MET/EFNA3/RASA3/KSR1/HTR7/MAPK3/PDGFB/PRKACB/PLD1/RASA1/CALML3/VEGFA/PLA2G4A | up | 48h |
| hsa05205 | Proteoglycans in cancer                | 1.70E-03 | MMP9/WNT10A/NRAS/MAPK11/MAPK13/MET/FZD7/WNT7B/ANK3/PLAU/TLR2/HBEGF/ERBB3/COL1A1/TGFB1/WNT3/HPSE/MAPK3/PRKACB/SDC1/TIMP3/ESR1/VEGFA                      | up | 48h |
| hsa04142 | Lysosome                               | 1.32E-04 | ACP5/SORT1/SMPD1/ABCA2/CTSS/SLC17A5/CTSC/CLN3/MANBA/FUCA1/ATP6V0A1/CTSD/GBA/AP1S2/NAGLU/CTSH/AP1S3/GNPTG/CD68                                           | up | 48h |
| hsa05418 | Fluid shear stress and atherosclerosis | 3.93E-04 | CALML5/MMP9/NCF2/IL1R1/PLAT/MAP2K4/IL1R2/RAC2/MAPK11/MAPK13/MAP3K5/GSTM4/PDGFB/SDC1/CALML3/VEGFA/ACVR2B/THBD/GSTA4                                      | up | 48h |
| hsa04510 | Focal adhesion                         | 2.38E-02 | BIRC3/LAMC2/RAC2/THBS3/THBS2/MET/ITGB8/ITGB6/LAMB2/COL1A1/COL6A1/MAPK3/FYN/PDGFB/ITGB4/GSK3B/CRK/VEGFA/LAMA3                                            | up | 48h |
| hsa04071 | Sphingolipid signaling pathway         | 1.55E-04 | GAB2/SMPD1/NRAS/SGPP2/RAC2/MAPK11/MAPK13/PRKCE/PPP2R1B/PPP2R5B/S1PR2/MAP3K5/CTSD/MAPK3/BDKRB2/FYN/PLD1/SPTLC2                                           | up | 48h |
| hsa04072 | Phospholipase D signaling pathway      | 2.18E-03 | PLA2G4E/PLA2G4F/PLA2G4B/GAB2/ADCY7/NRAS/DNM3/PLPP2/PLPP1/RAPGEF3/DGKQ/MAPK3/AGPAT2/FYN/PDGFB/PLD1/LPAR6/PLA2G4A                                         | up | 48h |
| hsa05152 | Tuberculosis                           | 1.64E-02 | CALML5/NOD2/MRC2/PLA2R1/CTSS/IRAK2/MAPK11/MAPK13/TLR2/ATP6V0A1/KSR1/CTSD/RAB7A/TGFB1/IFNGR1/MAPK3/IFNGR2/CALML3                                         | up | 48h |
| hsa04360 | Axon guidance                          | 1.72E-02 | ABLIM3/EPHA4/SEMA4B/NRAS/SEMA3C/RAC2/MET/EFNA3/SLIT3/PLXNA3/SEMA4A/MAPK3/ROBO3/FYN/PLXNB3/RASA1/GSK3B/EPHA1                                             | up | 48h |

|          |                                                      |          |                                                                                                                      |    |     |
|----------|------------------------------------------------------|----------|----------------------------------------------------------------------------------------------------------------------|----|-----|
| hsa05202 | Transcriptional misregulation in cancer              | 2.93E-02 | MMP9/CEBPA/MAF/HMGA2/MMP3/PLAT/PBX1/BIRC3/IL1R2/MET/TRAF1/FUT8/PLAU/FOXO1/CDK14/MLLT3/PAX8/DUSP6                     | up | 48h |
| hsa00564 | Glycerophospholipid metabolism                       | 4.06E-05 | GPAT3/PLA2G4E/PLA2G4F/PLA2G4B/PLA2G3/MBOAT2/PLPP2/PLPP1/ETNK2/DGKQ/CDS1/AGPAT2/PLD1/GPCPD1/CHKB/LPGAT1/PLA2G4A       | up | 48h |
| hsa04750 | Inflammatory mediator regulation of TRP channels     | 5.30E-05 | CALML5/PLA2G4E/PLA2G4F/PLA2G4B/TRPV3/ADCY7/IL1R1/MAPK11/MAPK13/PRKCE/PRKCQ/P2RY2/BDKRB2/PRKACB/CALML3/CYP2J2/PLA2G4A | up | 48h |
| hsa04668 | TNF signaling pathway                                | 2.25E-04 | MMP9/CCL20/MMP3/JAG1/NOD2/MAP2K4/BIRC3/MAPK11/MAPK13/TRAF1/CXCL1/PTGS2/RIPK3/MAP3K5/MAPK3/CFLAR/MLKL                 | up | 48h |
| hsa04915 | Estrogen signaling pathway                           | 2.50E-03 | CALML5/MMP9/KRT16/TGFA/ADCY7/KRT10/NRAS/KRT19/KRT15/HBEGF/CTSD/MAPK3/PRKACB/KRT34/KRT23/CALML3/ESR1                  | up | 48h |
| hsa04912 | GnRH signaling pathway                               | 7.55E-05 | CALML5/PLA2G4E/PLA2G4F/PLA2G4B/ADCY7/NRAS/MAP2K4/MAPK11/MAPK13/HBEGF/MAPK3/PRKACB/PLD1/EGR1/CALML3/PLA2G4A           | up | 48h |
| hsa04933 | AGE-RAGE signaling pathway in diabetic complications | 1.83E-04 | SERPINE1/NRAS/MAPK11/MAPK13/PRKCE/COL1A1/TGFB1/MAPK3/FOXO1/PLCD1/NFATC1/PLCD4/PIM1/EGR1/VEGFA/THBD                   | up | 48h |
| hsa04217 | Necroptosis                                          | 4.21E-02 | PLA2G4E/PLA2G4F/PLA2G4B/TNFSF10/SMPD1/BIRC3/RIPK3/PYGB/IFNGR1/CHMP4C/CFLAR/MLKL/SPATA2L/IFNGR2/PLA2G4A               | up | 48h |
| hsa00590 | Arachidonic acid metabolism                          | 1.07E-05 | ALOX15B/AKR1C3/GPX2/PLA2G4E/PLA2G4F/PLA2G4B/GGT1/GPX7/PLA2G3/PTGS2/EPHX2/GPX3/CYP2J2/PLA2G4A                         | up | 48h |
| hsa05231 | Choline metabolism in cancer                         | 1.45E-03 | PLA2G4E/PLA2G4F/PLA2G4B/NRAS/RAC2/PLPP2/PLPP1/DGKQ/MAPK3/PDGFB/PLD1/GPCPD1/CHKB/PLA2G4A                              | up | 48h |

|          |                                  |          |                                                                                               |    |     |
|----------|----------------------------------|----------|-----------------------------------------------------------------------------------------------|----|-----|
| hsa04726 | Serotonergic synapse             | 6.45E-03 | ALOX15B/PLA2G4E/PLA2G4F/PLA2G4B/GNG2/NRAS/PTGS2/RAPGEF3/HTR7/MAPK3/PRKACB/MAOA/CYP2J2/PLA2G4A | up | 48h |
| hsa04068 | FoxO signaling pathway           | 1.92E-02 | TNFSF10/NRAS/MAPK11/CDKN2B/MAPK13/FOXO4/NLK/FBXO25/TGFB1/MAPK3/FOXO1/HOMER2/CCNG2/CDKN2D      | up | 48h |
| hsa04140 | Autophagy - animal               | 2.71E-02 | NRBF2/NRAS/ATG4A/ULK1/RRAGC/PRKCQ/CTSD/RAB7A/MAPK3/CFLAR/PRKACB/TP53INP2/RPTOR/WIP1           | up | 48h |
| hsa04371 | Apelin signaling pathway         | 2.71E-02 | CALML5/JAG1/NOTCH3/SERPINE1/ADCY7/GNG2/NRAS/PLAT/PRKCE/MAPK3/HDAC4/PRKACB/EGR1/CALML3         | up | 48h |
| hsa04910 | Insulin signaling pathway        | 2.71E-02 | CALML5/NRAS/SOCS1/PTPN1/PYGB/MAPK3/FOXO1/PPP1R3B/PRKACB/CBLB/GSK3B/CRK/CALML3/RPTOR           | up | 48h |
| hsa04657 | IL-17 signaling pathway          | 2.85E-03 | MMP1/S100A8/MMP9/CCL20/S100A9/MMP3/MAPK11/MAPK13/CXCL1/PTGS2/MAPK3/GSK3B/LCN2                 | up | 48h |
| hsa04666 | Fc gamma R-mediated phagocytosis | 3.76E-03 | PLA2G4E/PLA2G4F/PLA2G4B/GAB2/GSN/RAC2/PRKCE/PLPP2/PLPP1/MAPK3/PLD1/CRK/PLA2G4A                | up | 48h |
| hsa05146 | Amoebiasis                       | 5.80E-03 | SERPINB3/IL1R1/IL1R2/LAMC2/SERPINB13/CXCL1/TLR2/LAMB2/COL1A1/RAB7A/TGFB1/PRKACB/LAMA3         | up | 48h |
| hsa04722 | Neurotrophin signaling pathway   | 1.99E-02 | CALML5/SORT1/NRAS/IRAK2/MAPK11/MAPK13/MAP3K5/MAPK3/MAGED1/GSK3B/ZNF274/CRK/CALML3             | up | 48h |
| hsa04380 | Osteoclast differentiation       | 3.39E-02 | ACP5/NCF2/GAB2/IL1R1/MAPK11/MAPK13/SOC S1/TGFB1/IFNGR1/MAPK3/FYN/NFATC1/IFNGR2                | up | 48h |

|          |                                  |          |                                                                                        |    |     |
|----------|----------------------------------|----------|----------------------------------------------------------------------------------------|----|-----|
| hsa04926 | Relaxin signaling pathway        | 3.58E-02 | MMP1/MMP9/ADCY7/GNG2/NRAS/MAP2K4/MAPK11/MAPK13/COL1A1/TGFB1/MAPK3/PRKACB/VEGFA         | up | 48h |
| hsa04913 | Ovarian steroidogenesis          | 2.49E-05 | AKR1C3/CYP1B1/PLA2G4E/PLA2G4F/PLA2G4B/ADCY7/PTGS2/CYP1A1/HSD17B1/PRKACB/CYP2J2/PLA2G4A | up | 48h |
| hsa04370 | VEGF signaling pathway           | 1.15E-04 | PLA2G4E/PLA2G4F/PLA2G4B/SH2D2A/NRAS/RAC2/MAPK11/MAPK13/PTGS2/MAPK3/VEGFA/PLA2G4A       | up | 48h |
| hsa04664 | Fc epsilon RI signaling pathway  | 4.64E-04 | PLA2G4E/PLA2G4F/PLA2G4B/GAB2/NRAS/MAP2K4/RAC2/MAPK11/MAPK13/MAPK3/FYN/PLA2G4A          | up | 48h |
| hsa04512 | ECM-receptor interaction         | 4.58E-03 | LAMC2/THBS3/THBS2/ITGB8/ITGB6/NPNT/LAMB2/COL1A1/COL6A1/SDC1/ITGB4/LAMA3                | up | 48h |
| hsa01522 | Endocrine resistance             | 1.08E-02 | MMP9/JAG1/NOTCH3/ADCY7/NRAS/MAPK11/MAPK13/HBEGF/MAPK3/BIK/PRKACB/ESR1                  | up | 48h |
| hsa05142 | Chagas disease                   | 1.45E-02 | SERPINE1/MAP2K4/MAPK11/MAPK13/PPP2R1B/TLR2/TGFB1/IFNGR1/MAPK3/BDKRB2/CFLAR/IFNGR2      | up | 48h |
| hsa05145 | Toxoplasmosis                    | 2.83E-02 | BIRC3/LAMC2/MAPK11/MAPK13/SOCS1/TLR2/LAMB2/TGFB1/IFNGR1/MAPK3/IFNGR2/LAMA3             | up | 48h |
| hsa05215 | Prostate cancer                  | 2.41E-02 | MMP9/MMP3/TGFA/NRAS/PLAT/IL1R2/PLAU/MAPK3/FOXO1/PDGFB/GSK3B                            | up | 48h |
| hsa04916 | Melanogenesis                    | 3.14E-02 | CALML5/WNT10A/ADCY7/NRAS/FZD7/WNT7B/WNT3/MAPK3/PRKACB/GSK3B/CALML3                     | up | 48h |
| hsa04974 | Protein digestion and absorption | 3.56E-02 | COL5A3/PRSS3/SLC36A1/COL5A2/COL7A1/COL5A1/SLC7A8/COL1A1/COL6A1/COL8A2/COL22A1          | up | 48h |
| hsa04659 | Th17 cell differentiation        | 4.51E-02 | IL1R1/MAPK11/MAPK13/PRKCQ/RORA/TGFB1/IFNGR1/MAPK3/NFATC1/IFNGR2/IL6R                   | up | 48h |



|          |                                                            |          |                                                                |    |     |
|----------|------------------------------------------------------------|----------|----------------------------------------------------------------|----|-----|
| hsa00480 | Glutathione metabolism                                     | 1.43E-03 | GPX2/GGT6/GGT1/GPX7/ODC1/GSTM4/GGT7/GPX3/OPLAH/GSTA4           | up | 48h |
| hsa04012 | ErbB signaling pathway                                     | 2.45E-02 | EREG/TGFA/NRAS/MAP2K4/HBEGF/ERBB3/MAPK3/CBLB/GSK3B/CRK         | up | 48h |
| hsa04658 | Th1 and Th2 cell differentiation                           | 3.96E-02 | MAF/JAG1/NOTCH3/MAPK11/MAPK13/PRKCQ/IFNGR1/MAPK3/NFATC1/IFNGR2 | up | 48h |
| hsa05323 | Rheumatoid arthritis                                       | 4.22E-02 | MMP1/ACP5/CCL20/MMP3/CXCL1/TLR2/ATP6V0A1/TGFB1/TNFSF13/VEGFA   | up | 48h |
| hsa05211 | Renal cell carcinoma                                       | 1.74E-02 | TGFA/NRAS/MET/EGLN3/TGFB1/MAPK3/PDGFB/CRK/VEGFA                | up | 48h |
| hsa01524 | Platinum drug resistance                                   | 2.44E-02 | ATP7B/BIRC3/MAP3K5/GSTM4/ERCC1/MAPK3/SLC31A1/ATP7A/GSTA4       | up | 48h |
| hsa05140 | Leishmaniasis                                              | 3.32E-02 | NCF2/MAPK11/MAPK13/PTGS2/TLR2/TGFB1/IFNGR1/MAPK3/IFNGR2        | up | 48h |
| hsa01521 | EGFR tyrosine kinase inhibitor resistance                  | 3.83E-02 | TGFA/NRAS/MET/ERBB3/MAPK3/PDGFB/GSK3B/IL6R/VEGFA               | up | 48h |
| hsa00565 | Ether lipid metabolism                                     | 6.61E-03 | PLA2G4E/PLA2G4F/PLA2G4B/PLA2G3/PLPP2/PLPP1/PLD1/PLA2G4A        | up | 48h |
| hsa00140 | Steroid hormone biosynthesis                               | 2.36E-02 | AKR1C3/CYP1B1/CYP1A1/STS/SULT2B1/AKR1C2/HSD17B1/AKR1C1         | up | 48h |
| hsa00561 | Glycerolipid metabolism                                    | 2.36E-02 | PNLIPRP3/GPAT3/DGAT2/MBOAT2/PLPP2/PLPP1/DGKQ/AGPAT2            | up | 48h |
| hsa05321 | Inflammatory bowel disease                                 | 3.32E-02 | MAF/NOD2/TLR2/RORA/TGFB1/IFNGR1/NFATC1/IFNGR2                  | up | 48h |
| hsa04137 | Mitophagy - animal                                         | 4.18E-02 | NRAS/BNIP3L/PINK1/ULK1/TBC1D17/TFEB/RAB7A/MFN1                 | up | 48h |
| hsa04917 | Prolactin signaling pathway                                | 4.84E-02 | NRAS/MAPK11/MAPK13/SOCS1/SOCS5/MAPK3/GSK3B/ESR1                | up | 48h |
| hsa05120 | Epithelial cell signaling in Helicobacter pylori infection | 4.84E-02 | PTPRZ1/MAP2K4/MAPK11/MAPK13/MET/CXCL1/HBEGF/ATP6V0A1           | up | 48h |

|          |                                    |          |                                                 |    |     |
|----------|------------------------------------|----------|-------------------------------------------------|----|-----|
| hsa05219 | Bladder cancer                     | 8.47E-03 | MMP1/TYMP/MMP9/NRAS/HBEGF/MAPK3/VEGFA           | up | 48h |
| hsa04975 | Fat digestion and absorption       | 1.10E-02 | DGAT2/PLA2G3/PLPP2/SLC27A1/PLPP1/SLC27A4/AGPAT2 | up | 48h |
| hsa02010 | ABC transporters                   | 1.40E-02 | ABCA12/ABCA2/DEFB1/ABCG1/ABCD1/ABCG2/ABCC5      | up | 48h |
| hsa00600 | Sphingolipid metabolism            | 2.18E-02 | SMPD1/SGPP2/PLPP2/PLPP1/GBA/UGCG/SPTLC2         | up | 48h |
| hsa05144 | Malaria                            | 2.41E-02 | LRP1/THBS3/THBS2/MET/TLR2/TGFB1/SDC1            | up | 48h |
| hsa00592 | alpha-Linolenic acid metabolism    | 2.52E-03 | PLA2G4E/PLA2G4F/PLA2G4B/PLA2G3/ACAA1/PLA2G4A    | up | 48h |
| hsa00591 | Linoleic acid metabolism           | 5.56E-03 | PLA2G4E/PLA2G4F/PLA2G4B/PLA2G3/CYP2J2/PLA2G4A   | up | 48h |
| hsa00430 | Taurine and hypotaurine metabolism | 2.25E-02 | GGT6/GGT1/GGT7                                  | up | 48h |

b) Results of KEGG pathway analysis by Enrichr using DEGs from NHEK cells transfected with miR-378a inhibitor or its control for 24 and 48 hours.

| ID       | Term                                                          | P-value  | Gene                        | Expression | Time |
|----------|---------------------------------------------------------------|----------|-----------------------------|------------|------|
| hsa00830 | Retinol metabolism                                            | 2.51E-02 | CYP26B1                     | down       | 24h  |
| hsa04061 | Viral protein interaction with cytokine and cytokine receptor | 3.67E-02 | ACKR3                       | down       | 24h  |
| hsa04668 | TNF signaling pathway                                         | 4.99E-04 | BIRC3/CXCL5/NOD2/CSF2/PTGS2 | up         | 24h  |
| hsa05167 | Kaposi sarcoma-associated herpesvirus infection               | 5.51E-03 | HLA-G/C3/CSF2/PTGS2/PREX1   | up         | 24h  |
| hsa04060 | Cytokine-cytokine receptor interaction                        | 2.99E-02 | IL1R2/INHBA/CXCL5/CSF2/IL32 | up         | 24h  |
| hsa04657 | IL-17 signaling pathway                                       | 2.26E-03 | CXCL5/CSF2/MMP1/PTGS2       | up         | 24h  |
| hsa04530 | Tight junction                                                | 1.76E-02 | CGN/PARD6B/CLDN7/DLG1       | up         | 24h  |

|          |                                                               |          |                          |      |     |
|----------|---------------------------------------------------------------|----------|--------------------------|------|-----|
| hsa05202 | Transcriptional misregulation in cancer                       | 2.67E-02 | BIRC3/IL1R2/CSF2/PLAT    | up   | 24h |
| hsa05166 | Human T-cell leukemia virus 1 infection                       | 4.04E-02 | IL1R2/HLA-G/CSF2/DLG1    | up   | 24h |
| hsa04612 | Antigen processing and presentation                           | 1.10E-02 | HSPA6/CTSS/HLA-G         | up   | 24h |
| hsa04610 | Complement and coagulation cascades                           | 1.38E-02 | C3/SERPINB2/PLAT         | up   | 24h |
| hsa05323 | Rheumatoid arthritis                                          | 1.76E-02 | CXCL5/CSF2/MMP1          | up   | 24h |
| hsa05150 | Staphylococcus aureus infection                               | 1.91E-02 | KRT19/KRT13/C3           | up   | 24h |
| hsa05146 | Amoebiasis                                                    | 2.24E-02 | IL1R2/CSF2/SERPINB9      | up   | 24h |
| hsa04915 | Estrogen signaling pathway                                    | 4.83E-02 | HSPA6/KRT19/KRT13        | up   | 24h |
| hsa05418 | Fluid shear stress and atherosclerosis                        | 4.92E-02 | IL1R2/HMOX1/PLAT         | up   | 24h |
| hsa00480 | Glutathione metabolism                                        | 4.49E-02 | CHAC1/GGT6               | up   | 24h |
| hsa05134 | Legionellosis                                                 | 4.49E-02 | HSPA6/C3                 | up   | 24h |
| hsa04978 | Mineral absorption                                            | 4.78E-02 | SLC5A1/HMOX1             | up   | 24h |
| hsa04060 | Cytokine-cytokine receptor interaction                        | 3.08E-04 | IL33/TNFSF10/BMP4/CXCL14 | down | 48h |
| hsa05130 | Pathogenic Escherichia coli infection                         | 1.51E-03 | MAPK11/TNFSF10/TUBA4A    | down | 48h |
| hsa05132 | Salmonella infection                                          | 2.96E-03 | MAPK11/TNFSF10/TUBA4A    | down | 48h |
| hsa04061 | Viral protein interaction with cytokine and cytokine receptor | 6.40E-03 | TNFSF10/CXCL14           | down | 48h |
| hsa04722 | Neurotrophin signaling pathway                                | 8.97E-03 | MAPK11/TP73              | down | 48h |
| hsa04611 | Platelet activation                                           | 9.71E-03 | PTGS1/MAPK11             | down | 48h |
| hsa04068 | FoxO signaling pathway                                        | 1.08E-02 | MAPK11/TNFSF10           | down | 48h |
| hsa04210 | Apoptosis                                                     | 1.16E-02 | TNFSF10/TUBA4A           | down | 48h |

|          |                                                          |          |                                    |      |     |
|----------|----------------------------------------------------------|----------|------------------------------------|------|-----|
| hsa05418 | Fluid shear stress and atherosclerosis                   | 1.21E-02 | MAPK11/BMP4                        | down | 48h |
| hsa04550 | Signaling pathways regulating pluripotency of stem cells | 1.28E-02 | MAPK11/BMP4                        | down | 48h |
| hsa04261 | Adrenergic signaling in cardiomyocytes                   | 1.40E-02 | MAPK11/SCN4B                       | down | 48h |
| hsa04390 | Hippo signaling pathway                                  | 1.53E-02 | BMP4/TP73                          | down | 48h |
| hsa04217 | Necroptosis                                              | 1.56E-02 | IL33/TNFSF10                       | down | 48h |
| hsa05164 | Influenza A                                              | 1.79E-02 | IL33/TNFSF10                       | down | 48h |
| hsa05020 | Prion disease                                            | 4.28E-02 | MAPK11/TUBA4A                      | down | 48h |
| hsa04530 | Tight junction                                           | 7.05E-04 | PARD6B/CGN/CLDN7/OCLN/NEDD4L/CLDN4 | up   | 48h |
| hsa05418 | Fluid shear stress and atherosclerosis                   | 1.91E-03 | IL1R2/HMOX1/ASS1/SQSTM1/EDN1       | up   | 48h |
| hsa04060 | Cytokine-cytokine receptor interaction                   | 4.03E-02 | IL1RL1/CSF2/INHBA/IL1R2/TNFSF15    | up   | 48h |
| hsa04657 | IL-17 signaling pathway                                  | 3.04E-03 | CSF2/MMP1/PTGS2/MMP3               | up   | 48h |
| hsa04668 | TNF signaling pathway                                    | 5.69E-03 | CSF2/PTGS2/MMP3/EDN1               | up   | 48h |
| hsa04514 | Cell adhesion molecules                                  | 1.52E-02 | CLDN7/OCLN/HLA-G/CLDN4             | up   | 48h |
| hsa05202 | Transcriptional misregulation in cancer                  | 3.46E-02 | CSF2/MMP3/IL1R2/GADD45B            | up   | 48h |
| hsa05167 | Kaposi sarcoma-associated herpesvirus infection          | 3.51E-02 | CSF2/PTGS2/FGF2/HLA-G              | up   | 48h |
| hsa05416 | Viral myocarditis                                        | 6.65E-03 | CD55/HLA-G/ABL2                    | up   | 48h |
| hsa01230 | Biosynthesis of amino acids                              | 1.23E-02 | ASNS/CBS/ASS1                      | up   | 48h |
| hsa05323 | Rheumatoid arthritis                                     | 2.18E-02 | CSF2/MMP1/MMP3                     | up   | 48h |
| hsa04640 | Hematopoietic cell lineage                               | 2.56E-02 | CSF2/IL1R2/CD55                    | up   | 48h |
| hsa04670 | Leukocyte transendothelial migration                     | 3.67E-02 | CLDN7/OCLN/CLDN4                   | up   | 48h |

|          |                                                            |          |               |    |     |
|----------|------------------------------------------------------------|----------|---------------|----|-----|
| hsa04977 | Vitamin digestion and absorption                           | 1.03E-02 | LRAT/SLC19A2  | up | 48h |
| hsa00601 | Glycosphingolipid biosynthesis - lacto and neolacto series | 1.29E-02 | FUT3/GCNT2    | up | 48h |
| hsa00250 | Alanine, aspartate and glutamate metabolism                | 2.35E-02 | ASNS/ASS1     | up | 48h |
| hsa04216 | Ferroptosis                                                | 2.84E-02 | HMOX1/SLC7A11 | up | 48h |

### Supplementary Table S2

List of primers used for real-time qPCR in this study.

| Gene            | Forward sequence (5' -- 3') | Reverse sequence (5' -- 3') |
|-----------------|-----------------------------|-----------------------------|
| <i>BMP2</i>     | CCCACGGAGGAGTTTATCAC        | GAGTTGGCTGTTGCAGGTTT        |
| <i>INHBA</i>    | GGAGAACGGGTATGTGGAGA        | ACAGGTCACTGCCTTCCTTG        |
| <i>KIAA1522</i> | AAACTGAACAAGGGTGGCTG        | TAGGATGTGGTCTGACTGCA        |
| <i>KRT80</i>    | ACTCAGCCATCTTCGACCTC        | ACTCCTCAACCTTCTCCAGC        |
| <i>PEF1</i>     | AGCCACCTCCAAGTTCCTAC        | AGCCACTGTGATCTGAGTCC        |
| <i>TMEM245</i>  | TGGAAGGAGCAATCATCGGT        | GTTTGGCGTGGGAACTGAAT        |
| <i>TOB2</i>     | GAAGGGAGCTGTGAAAGTGC        | GAATGAAGGTAGGGCTGGGT        |
| <i>GUSB</i>     | TGCAGGTGATGGAAGAAGTG        | TTGCTCACAAAGGTCACAGG        |

### Supplementary Table S3

List of miR-378a, *BMP2* 3' UTR, *BMP2* 3' UTR mutant, *INHBA* 3' UTR and *INHBA* 3' UTR mutant used in the luciferase study.

| Name                      | Sequence                         |
|---------------------------|----------------------------------|
| has-miR-378a              | 3' CGGAAGACTGAGGTTTCAGGTCA 5'    |
| <i>BMP2</i> 3'UTR         | 5' AGTTCACAAGTTCAAGTCCAGA 3'     |
| <i>BMP2</i> 3'UTR mutant  | 5' AGTTCACAAGTTCAAGTCTCA 3'      |
| <i>INHBA</i> 3'UTR        | 5' AGCTTGAGAGTGGATTCTAATCCAGG 3' |
| <i>INHBA</i> 3'UTR mutant | 5' AGCTTGAGAGTGGATTCTAATGTCG 3'  |
